# Supplementary material
Source: publisher figshare collection journal article supplement (https://sage.figshare.com/ndownloader/files/15449846)
Supplement: Supplementary file 1 [file 15449846]

| Article            | Type of dorsal Dupuytren's disease                                                                                                                                                                                                                                          | Location                                                          | Histology                                                                                                                                                                                                     |
|--------------------|-----------------------------------------------------------------------------------------------------------------------------------------------------------------------------------------------------------------------------------------------------------------------------|-------------------------------------------------------------------|---------------------------------------------------------------------------------------------------------------------------------------------------------------------------------------------------------------|
| Garrod AE, 1893    | Knuckle pads                                                                                                                                                                                                                                                                | PIP,DIP,MP, thumb IP joints                                       | NR                                                                                                                                                                                                            |
| Garrod AE, 1904    | Knuckle pads                                                                                                                                                                                                                                                                | PIP joint                                                         | NR                                                                                                                                                                                                            |
| Weber F, 1938      | Knuckle pads                                                                                                                                                                                                                                                                | PIP joint                                                         | NR                                                                                                                                                                                                            |
| Coste F, 1942      | Knuckle pads                                                                                                                                                                                                                                                                | PIP and DIP joints                                                | Hyperkeratosis                                                                                                                                                                                                |
| Lagier R, 1975     | Knuckle pads                                                                                                                                                                                                                                                                | PIP joint                                                         | Dense fibrosis within which are areas of fibroblastic proliferation                                                                                                                                           |
| Mikkelsen OA, 1977 | Knuckle pads                                                                                                                                                                                                                                                                | PIP joint<br>Between PIP and DIP joints                           | NR                                                                                                                                                                                                            |
| Hueston JT, 1982   | Nodule fixed on the extensor tendon limiting flexion of the DIP joint                                                                                                                                                                                                       |                                                                   | Hyperplastic tissue mingled with more mature tissue and activity of the fibroblasts in the nodule                                                                                                             |
| Addison A, 1984    | Knuckle pads limiting flexion of the PIP joints with swan neck deformity (the skin was adherent to the central slip of the extensor; the lateral slip were stuck to the central slip by Dupuytren's disease)                                                                | PIP joint                                                         | Typical Dupuytren's disease                                                                                                                                                                                   |
| Hueston JT, 1984   | Knuckle pads (cases 1 and 2); nodule with hyperextension of the DIP joint (case 3).                                                                                                                                                                                         | PIP joint (cases 1 and 2);<br>Between PIP and DIP joints (case 3) | Highly cellular nodule with fibroblasts within it                                                                                                                                                             |
| Iselin F, 1988     | Knuckle pads (9 patients)                                                                                                                                                                                                                                                   | PIP joint                                                         | Highly cellular nodule with fibroblasts                                                                                                                                                                       |
|                    | Nodules (3 patients)                                                                                                                                                                                                                                                        | Between PIP and DIP joints                                        | Highly cellular nodule with fibroblasts                                                                                                                                                                       |
| Kuhlmann JN, 1988  | Infiltration of the transverse retinacular ligaments with boutonniere deformity                                                                                                                                                                                             | Retinacular ligaments                                             | NR                                                                                                                                                                                                            |
| Caroli A, 1991     | Knuckle pads                                                                                                                                                                                                                                                                | PIP joint                                                         | Fibroblast-like cells surrounded by a poorly organised matrix, in which fibrils can be recognised                                                                                                             |
| Irwin LR, 1997     | Knuckle pads                                                                                                                                                                                                                                                                | NR                                                                | Dense fibrous matrix within which were areas of dense cellular deposition containing myofibroblasts.<br>The contractility of these fibroblast were similar to those obtained from Dupuytren's palmar nodules. |
| Boyce DE, 2004     | Oblique cord on the radial side coursing parallel to the oblique retinacular ligament but inserting proximal to the PIP joint, tethering the central slip and lateral band, involving the transverse retinacular ligament between the two and causing a swan-neck deformity | PIP joint                                                         | Typical Dupuytren's disease                                                                                                                                                                                   |
| Abe Y              | Knuckle pads                                                                                                                                                                                                                                                                | NR                                                                | NR                                                                                                                                                                                                            |

|                    |                                                                                |                                                   |                                                                                          |
|--------------------|--------------------------------------------------------------------------------|---------------------------------------------------|------------------------------------------------------------------------------------------|
| Rayan GM, 2010     | Dorsal nodules (4), Knuckle pads (6), Both dorsal nodules and knuckle pads (5) | PIP joint (13 patients),<br>MP joint (3 patients) | NR                                                                                       |
| Tamborrini G, 2012 | Knuckle pads                                                                   | PIP joint                                         | Proliferation of myofibroblasts with a decrease of elastic filaments in the deep dermis. |

---

PIP : Proximal inter phalangeal ; DIP : distal interphalangeal ; MP : metacarpophalangeal ; IP : interphalangeal ; NR : not reported
